# Supplementary material
Source: Springer Nature journal article supplement (https://www.springermedizin.de/resource/supplementary/13058_2013_3553_MOESM25_ESM.pdf/9703942)

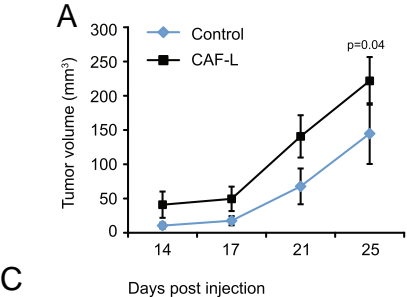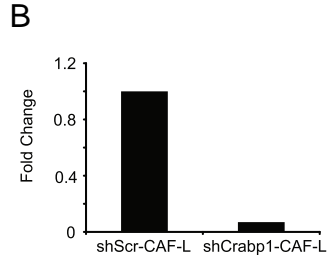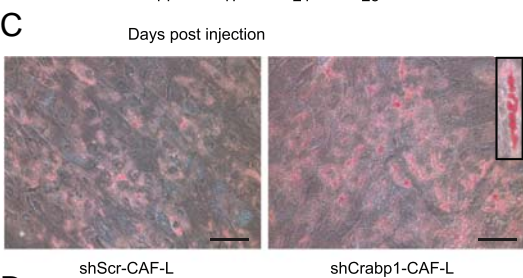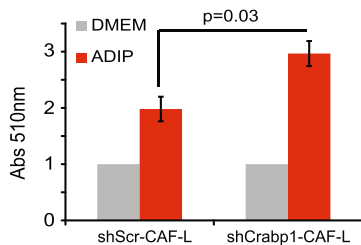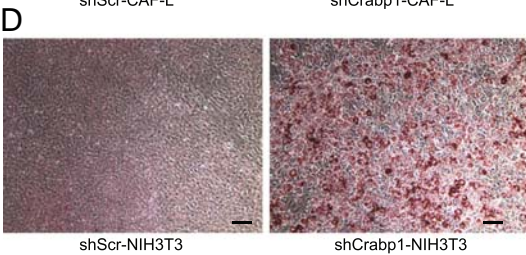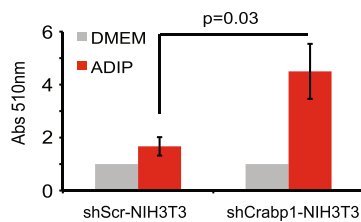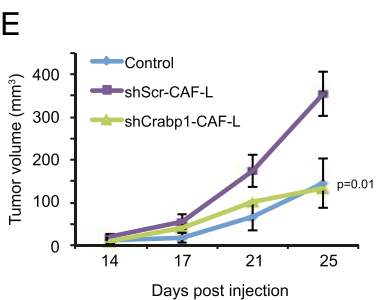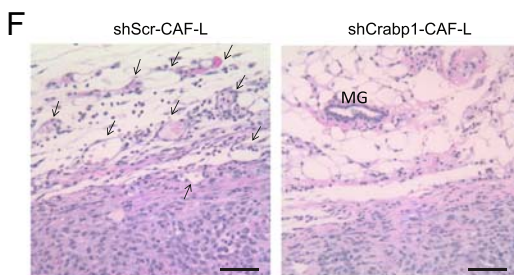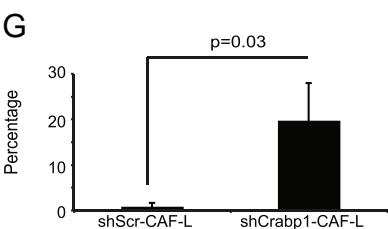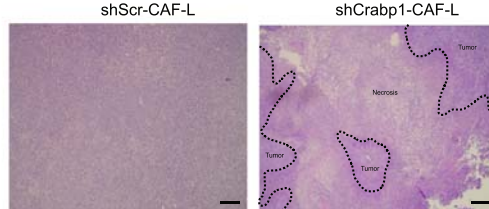

**H**

Normal Development

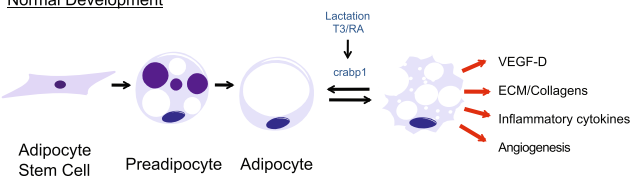

Cancer

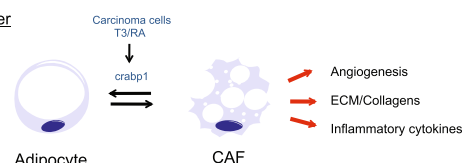

Supplement: MOESM25 [file 9703942]
